# Supplementary material
Source: publisher figshare collection journal article supplement (https://gsajournals.figshare.com/ndownloader/files/19068674)
Supplement: Supplementary file 1 [file 19068674]

**Table S1. Oligonucleotides used**

| **For qPCR** | | |
| --- | --- | --- |
| **Gene** | **Forward Primer** | **Reverse Primer** |
| actin | CTGAACCCCAAGGCCAACCG | CCGTCACCGGAGTCCATCAC |
| Nemo | GCTCAGCCTGCAACTGACAGTCTGCCTGGC | GCACCACCCAGTAGCACTTCTTCCTCCTCACC |
| Nemo2 | GCTCAGCCTGCAACTGACAGTCTGCCTGGC | GGGTGCTTGTTCATCCAACAGGACAGTGTCTCACC |
| Cav1 | GGGCAAATACGTAGACTCCGAGGGACATCTC | GTCACCTCGTCTGCCATGGCCTTGTTGTTGGGC |
| Cav1 | GGCTTGGCCGGTTGCCCTCACAGGGACATCTC | GTCACCTCGTCTGCCATGGCCTTGTTGTTGGGC |
| Ogdh-4a | GTGCAGTCTCTCATCAGGGCATATCAGGTCAGG | GGAGCATCATCAAAATTTACACAACTAATTCCGAG |
| Ogdh-4b | GGTGCAGTCTCTCATCAGGGCATATCAGATACGAG | GTCAGCGGGCACGGAGGAGTCCAGATCAG |
| **For RT-PCR of Nemo** | | |
| RT primer | GAC TCC GAA GAT CAA GCT TCT CCA AGC TCA GTC TC | |
| Forward | CCT TGT TTT GGC TCA GCC TGC AAC TGA CAG | |
| Reverse | CAG CTT CCG GGC TTC CTG GAA TTT GCA CAT AAG G | |
| **For oligo efficiency determination** | | |
| Cav1 | CAT GTC TGG GGG CAA ATA CGT AGA CTC CGA GGG ACA TCT CTA CAC TGT TCC CAT CCG GGA ACA GGG CAA CAT CTA CAA GCC CAA CAA CAA GGC CAT GGC AGA CGA GGT GAC TGA GAA GCA | |
| Cav1 | CCC TCC CCT GGC TTG GCC GGT TGC CCT CAC AGG GAC ATC TCT ACA CTG TTC CCA TCC GGG AAC AGG GCA ACA TCT ACA AGC CCA ACA ACA AGG CCA TGG CAG ACG AGG TGA CTG AGA AGC | |
| Ogdh-4a | GAG GAC CAC TTG GCG GTG CAG TCT CTC ATC AGG GCA TAT CAG GTC AGG GGT CAC CAC ATT GCA AAA CTT GAT CCT CTC GGA ATT AGT TGT GTA AAT TTT GAT GAT GCT CCG GTA ACT GTT TCT TC | |
| Ogdh-4b | TGA GAT AAT GTC AGC GGG CAC GGA GGA GTC CAG ATC AGC ATC CAA AAT CCC CAG GGG GTC CAG CTG TGC TAC ATG GTG CCC TCG TAT CTG ATA TGC CCT GAT GAG AGA CTG CAC CGC CAA GTG GT | |
